# Supplementary material for: Cigarillo Flavor and Motivation to Quit among Co-Users of Cigarillos and Cannabis: A Structural Equation Modeling Approach
Source: MDPI journal article supplement (doi:10.3390/ijerph19095727), 2022-05-08
Supplement: s1 [file s1]

## Supplemental Table S1

**Table S1. Proposed Items for Measurement of Nicotine Dependence and Cigarillo Harm Perceptions.**

| <b>Nicotine Dependence</b>                                                                                                                                                                                                                           |
|------------------------------------------------------------------------------------------------------------------------------------------------------------------------------------------------------------------------------------------------------|
| <b>When I haven't been able to smoke for a few hours, the craving gets intolerable. (Never, Rarely, Sometimes, Often, Always)</b>                                                                                                                    |
| <b>I drop everything to go out and buy tobacco products. (Never, Rarely, Sometimes, Often, Always)</b>                                                                                                                                               |
| I smoke before going into a situation where smoking is not allowed. (Never, Rarely, Sometimes, Often, Always)                                                                                                                                        |
| <b>I find myself reaching for tobacco products without thinking about it. (Never, Rarely, Sometimes, Often, Always)</b>                                                                                                                              |
| <b>I chain smoke tobacco products. (Never, Rarely, Sometimes, Often, Always)</b>                                                                                                                                                                     |
| <b>I feel anxious when I run out of tobacco products. (Never, Rarely, Sometimes, Often, Always)</b>                                                                                                                                                  |
| <b>The only thing that can calm me down is a tobacco product. (Never, Rarely, Sometimes, Often, Always)</b>                                                                                                                                          |
| <b>I get irritated if I can't smoke a tobacco product when I feel like using one. (Never, Rarely, Sometimes, Often, Always)</b>                                                                                                                      |
| <b>I think about how I will get my next tobacco product. (Never, Rarely, Sometimes, Often, Always)</b>                                                                                                                                               |
| I like to smoke an entire tobacco product by myself. (Never, Rarely, Sometimes, Often, Always)                                                                                                                                                       |
| When I am in a group, I prefer to smoke my tobacco product without sharing. (Never, Rarely, Sometimes, Often, Always)                                                                                                                                |
| I plan to have tobacco products available when I need them. (Never, Rarely, Sometimes, Often, Always)                                                                                                                                                |
| <b>Perceived Cigarillo Harm</b>                                                                                                                                                                                                                      |
| <b>In general, how harmful do you think cigarillo smoking is to a person's health? (Not at all harmful, Somewhat harmful, Moderately harmful, Very harmful)</b>                                                                                      |
| In general, how harmful do you think blunt smoking is to a person's health? A blunt is a cigarillo that is filled with marijuana, cannabis, hash, THC, grass, pot, or weed. (Not at all harmful, Somewhat harmful, Moderately harmful, Very harmful) |
| <b>In general, how harmful do you think smoking a fruit flavored cigarillo is to a person's health? (Not at all harmful, Somewhat harmful, Moderately harmful, Very harmful)</b>                                                                     |

|                                                                                                                                                                                            |
|--------------------------------------------------------------------------------------------------------------------------------------------------------------------------------------------|
| <b>In general, how harmful do you think smoking a sweet and candy flavored cigarillo is to a person's health? (Not at all harmful, Somewhat harmful, Moderately harmful, Very harmful)</b> |
| <b>In general, how harmful do you think smoking a mint flavored cigarillo is to a person's health? (Not at all harmful, Somewhat harmful, Moderately harmful, Very harmful)</b>            |
| <b>In general, how harmful do you think smoking an alcohol flavored cigarillo is to a person's health? (Not at all harmful, Somewhat harmful, Moderately harmful, Very harmful)</b>        |
| <b>In general, how harmful do you think smoking a menthol flavored cigarillo is to a person's health? (Not at all harmful, Somewhat harmful, Moderately harmful, Very harmful)</b>         |
| <b>In general, how harmful do you think smoking a tobacco flavored cigarillo is to a person's health? (Not at all harmful, Somewhat harmful, Moderately harmful, Very harmful)</b>         |
| How addictive is flavored cigarillo smoking compared to cigarette smoking? (Much less addictive, Less addictive, They are the same, More addictive, Much more addictive)                   |
| How easy is it to quit flavored cigarillo smoking compared to cigarette smoking? (Much less addictive, Less addictive, They are the same, More addictive, Much more addictive)             |

Bolded items were included in the final model

## Supplemental Table S2

**Table S2. Structural Equation Model Fit Statistics by Multiply Imputed Dataset (n=5).**

| Fit Statistic  | Motivation to Quit Cigarillos |                      | Motivation to Quit Cannabis |
|----------------|-------------------------------|----------------------|-----------------------------|
|                | Overall                       | By Race/Ethnicity    |                             |
| RMSEA (90% CI) |                               |                      |                             |
| Dataset 1      | 0.029 (0.012, 0.041)          | 0.023 (0.000, 0.038) | 0.028 (0.012, 0.040)        |
| Dataset 2      | 0.030 (0.014, 0.041)          | 0.033 (0.014, 0.046) | 0.030 (0.014, 0.041)        |
| Dataset 3      | 0.028 (0.011, 0.040)          | 0.019 (0.000, 0.036) | 0.028 (0.010, 0.040)        |
| Dataset 4      | 0.035 (0.022, 0.046)          | 0.034 (0.017, 0.047) | 0.035 (0.022, 0.046)        |
| Dataset 5      | 0.028 (0.012, 0.040)          | 0.020 (0.000, 0.037) | 0.028 (0.012, 0.040)        |
| CFI            |                               |                      |                             |
| Dataset 1      | 0.992                         | 0.995                | 0.992                       |
| Dataset 2      | 0.992                         | 0.991                | 0.992                       |
| Dataset 3      | 0.992                         | 0.996                | 0.992                       |
| Dataset 4      | 0.989                         | 0.990                | 0.989                       |
| Dataset 5      | 0.992                         | 0.996                | 0.992                       |
| TLI            |                               |                      |                             |
| Dataset 1      | 0.991                         | 0.995                | 0.991                       |
| Dataset 2      | 0.991                         | 0.991                | 0.991                       |
| Dataset 3      | 0.991                         | 0.996                | 0.991                       |
| Dataset 4      | 0.987                         | 0.990                | 0.987                       |
| Dataset 5      | 0.991                         | 0.996                | 0.991                       |
| SRMR           |                               |                      |                             |
| Dataset 1      | 0.074                         | 0.104                | 0.074                       |
| Dataset 2      | 0.073                         | 0.096                | 0.073                       |
| Dataset 3      | 0.074                         | 0.106                | 0.074                       |
| Dataset 4      | 0.075                         | 0.100                | 0.075                       |
| Dataset 5      | 0.074                         | 0.102                | 0.074                       |

RMSEA=Root Mean Square Error of Approximation; CFI=Comparative Fit Index; TLI=Tucker Lewis Index; SRMR=standardized root mean squared residual

Supplemental Figure S1

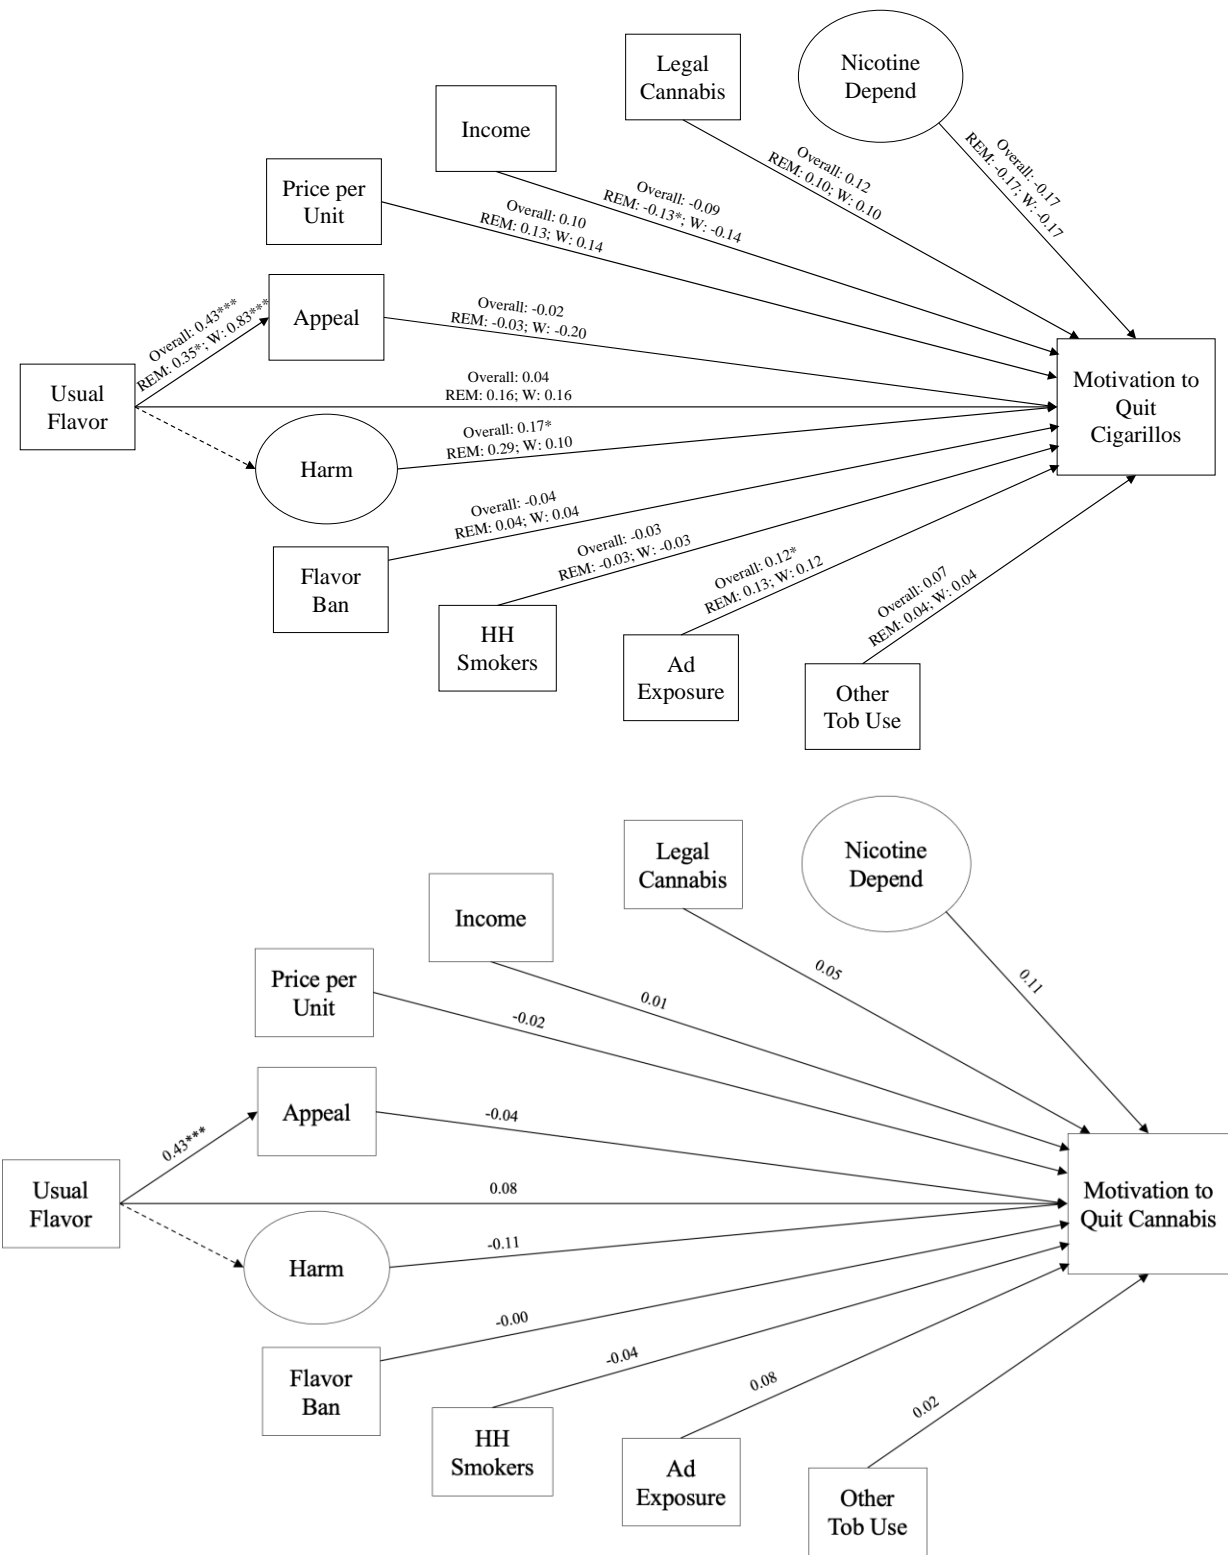

**Figure S1. Final Structural Equation Model Results.** \* $p < 0.05$ ; \*\* $p < 0.01$ ; \*\*\* $p < 0.001$ ;  
HH=household, Ad=advertising, Tob=tobacco, Depend=dependence, REM=racial/ethnic  
minority, W=white
